# Supplementary material
Source: publisher figshare collection journal article supplement (https://tandf.figshare.com/ndownloader/files/17602547)
Supplement: Supplementary file 1 [file 17602547]

**Supporting Information Cover Sheet**

**Tailoring polycarboxylate architecture to improve the rheological properties of cement paste ***

Xiumei Wang,1 Yong Yang,1 Xin Shu,1 Qianping Ran1*and Jiaping Liu1,2*

1 State Key Laboratory of High Performance Civil Engineering Materials, Jiangsu Sobute New Materials Co. Ltd., Nanjing, China

2 School of Material Science and Engineering, Southeast University, Nanjing, China

Correspondence to Q. Ran (E-mail: qpran@cnjsjk.cn)

Number of pages: 4

Number of figures: 2

* Supported by National Key R&D Program of China (2017YFB0310100) and National Nature Science Foundation of China (51438003).

** Corresponding author, Tel & Fax: 86-25-52837035 Email: qpran@cnjsjk.cn

**Table of Contents**

| **Index** | **Captions** | **Page** |
| --- | --- | --- |
| **Fig. S1** | GPC figures of PC with different architectures | S3 |
| **Fig. S2** | Characterization of PC using 1H NMR | S4 |


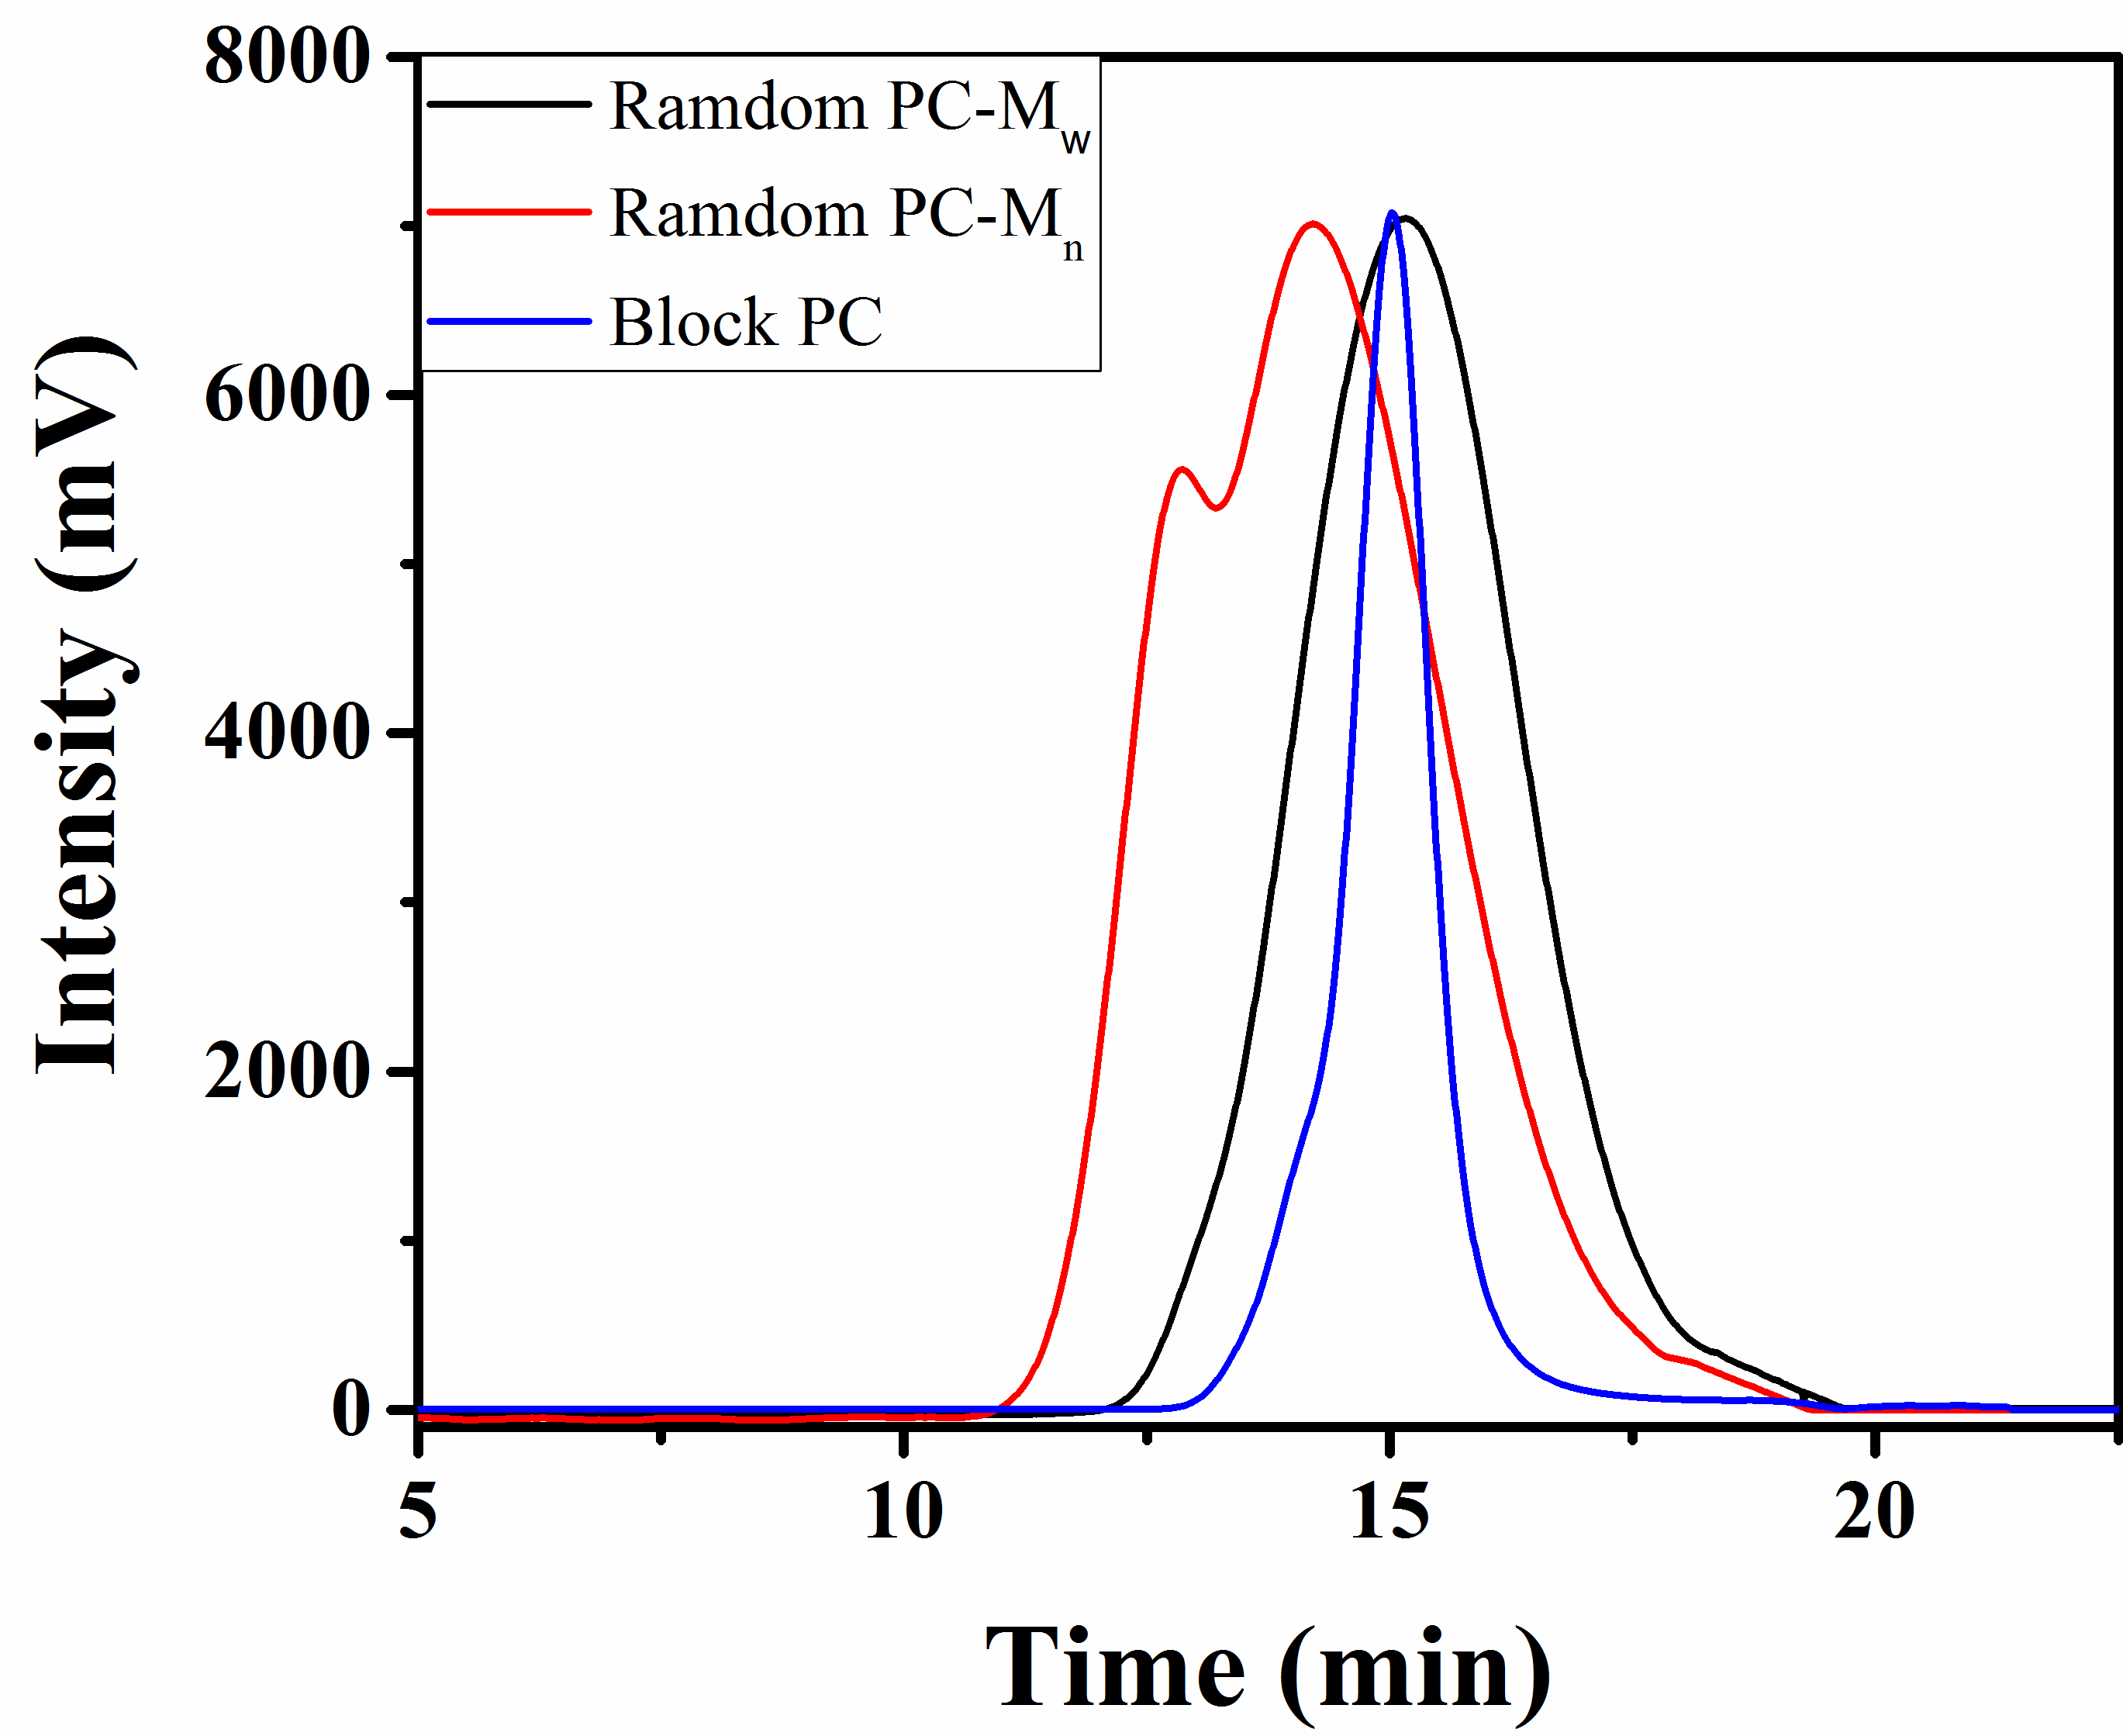


**Fig. S1** GPC figures of PC with different architectures


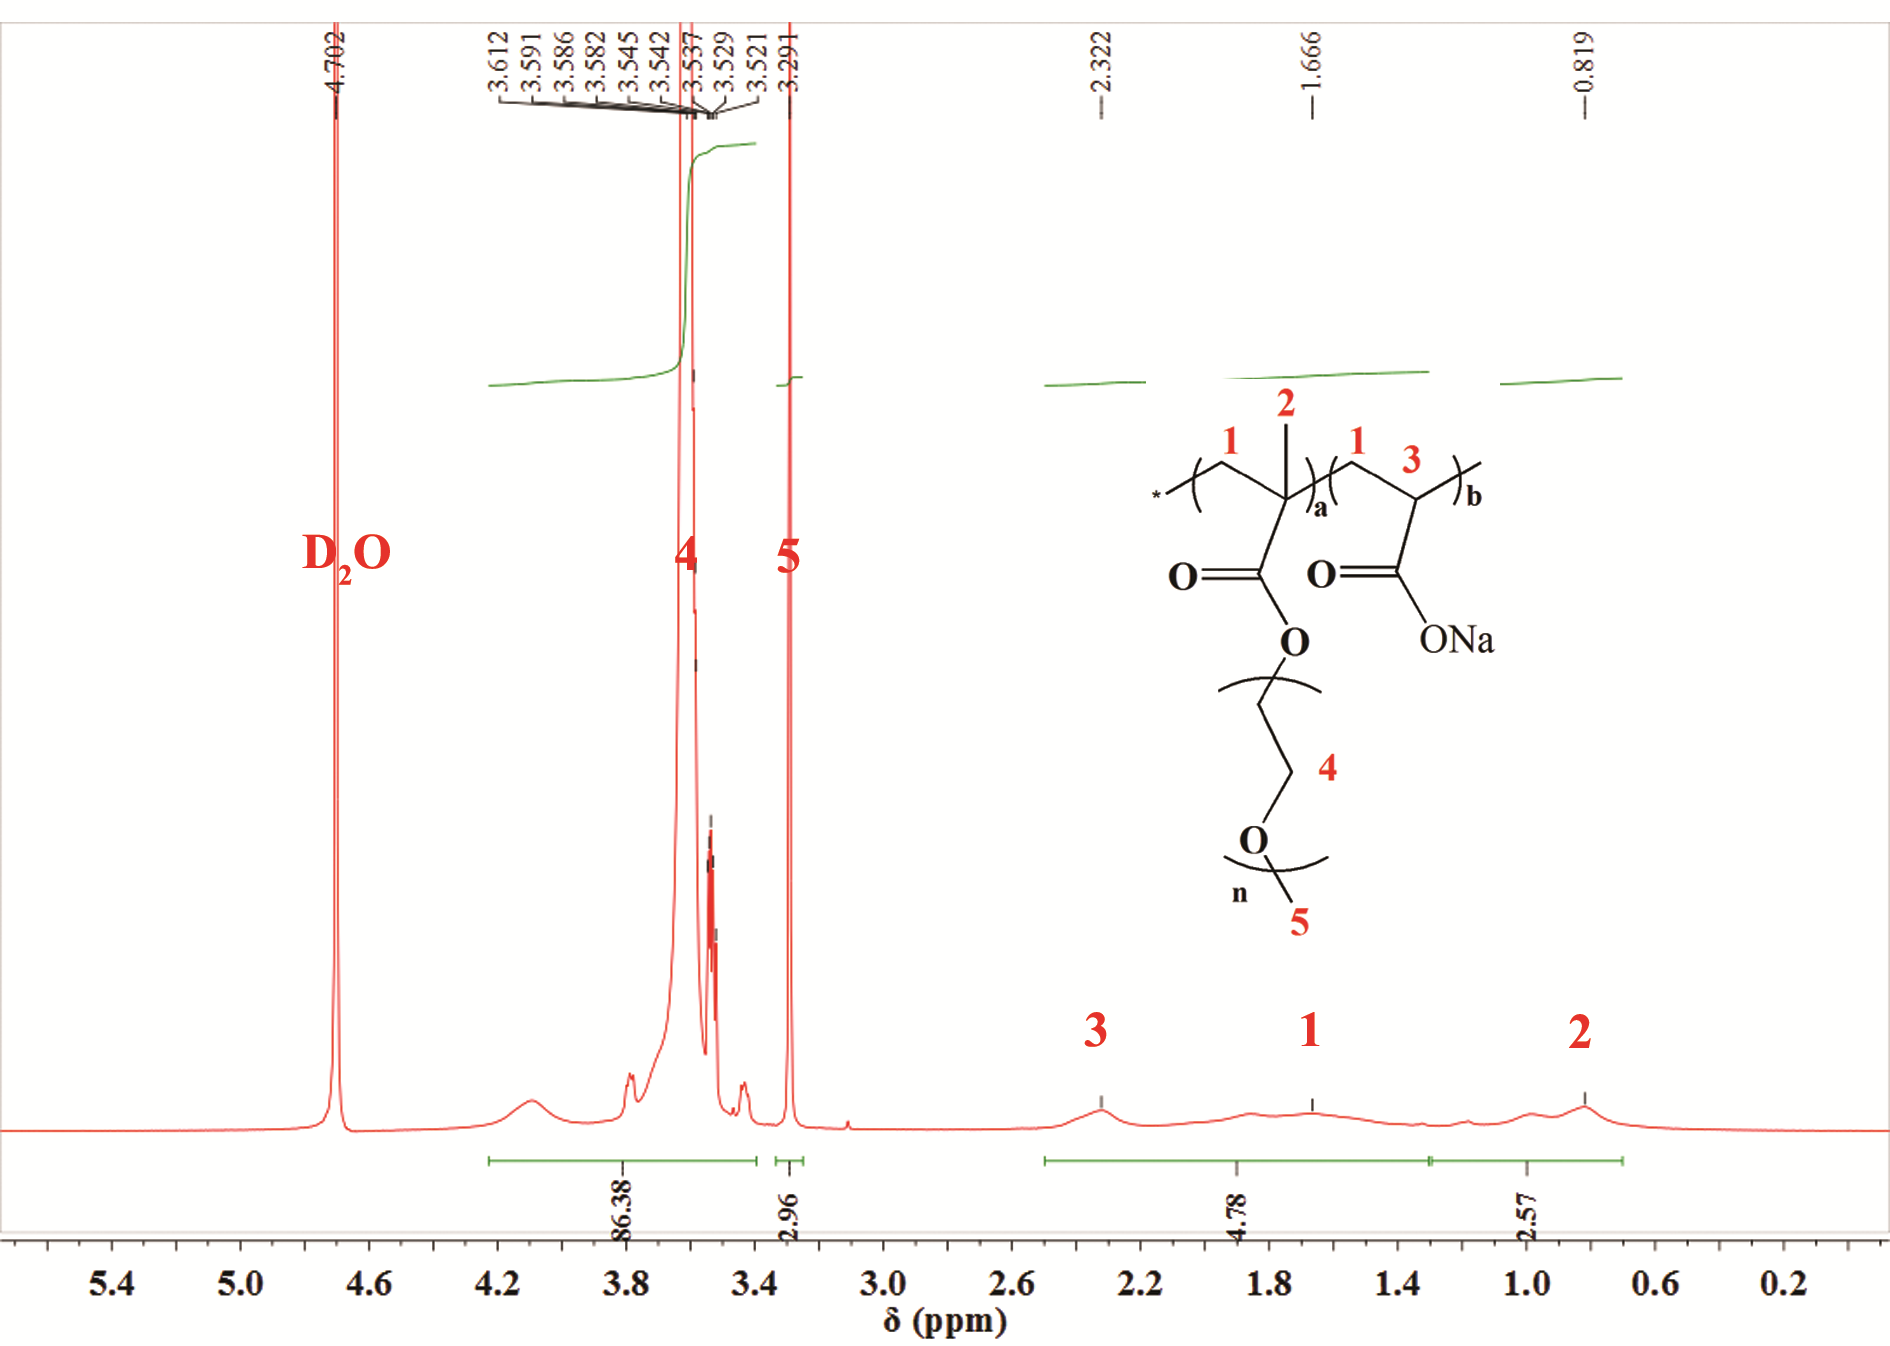


**Fig. S2** Characterization of PC using 1H NMR
